# Supplementary material for: SIRT1/PGC1α-Dependent Increase in Oxidative Phosphorylation Supports Chemotherapy Resistance of Colon Cancer
Source: Oxford University Press journal article supplement (doi:10.1158/1078-0432.ccr-14-2290), 2015-03-16
Supplement: 10780432ccr142290-sup-137351_3_supp_2859125_njm5j2.xlsx [file 10780432ccr142290-sup-137351_3_supp_2859125_njm5j2.xlsx]

## Sheet: Table S1
List of primers for RT-qPCR
Gene	Forward	Reverse
RPL13a	GCCATCGTGGCTAAACAGGTA	GTTGGTGTTCATCCGCTTGC
SIRT1	TGCTGGCCTAATAGAGTGGCAAAG	TCTGGCATGTCCCACTATCACTGT
PGC1α	GTAAATCTGCGGGATGATGG	AATTGCTTGCGTCCACAAA
NDUFS3	ACTGTCAGACCACGGAATGAT	GGGCAAGATTTCAGCCACATAC
ATP5G1	CTGTTGTACCAGGGGTCTAATCA	GTGGGAAGTTGCTGTAGGAAG
PKM2	ATTATTTGAGGAACTCCGCCGCCT	ATTCCGGGTCACAGCAATGATGG
PKFP	GCATGGGTATCTACGTGGGG	CTCTGCGATGTTTGAGCCTC
Hexokinase II	TGCCACCAGACTAAACTAGACG	CCCGTGCCCACAATGAGAC

## Sheet: Table S2
Variables	# differentially expressed genes (p<0.05)
Neo-adjuvant chemotherapy	1094
Viable tumor (%)	235
Resection margin	156
Stage	151
R0 vs R1	69
Clamping	40
Invasion vasculature	31
Female	18
Resection interval days	13
Days to recurrence	5
Number of liver mets	2
blood transfusion	2
Alive	0
Age	0
basinstroke_postop_score	0
basinstroke_postop_score (#)	0
bilobar	0
CEA before resection	0
CEA post resection	0
Colon/rectum (#)	0
Differentiation	0
Follow-up time	0
Fong score	0
High risk	0
Iwatsuki (#)	0
Location primary tumor	0
Major/minor resection	0
N	0
Nordlinger score	0
Number of segments resected	0
Recurrence	0
Size biggest tumor	0
Synchronous	0

## Sheet: Table S3
Genes UP in chemotherapy-treated tumors (p<0.05)						Genes DOWN in chemotherapy-treated tumors (p<0.05)
HSAC001436	THAP1	0.53	anova	9.572e-06		HSAC018667	XXbac-BPG154L12,4	-0.468	anova	0.000641879
HSAC014202	SEC22A	0.457	anova	0.000699573		HSAC017592	AGPAT5	-0.463	anova	0.000633485
HSAC017437	NDUFA13	0.445	anova	0.00130912		HSAC001661	ZNF91	-0.442	anova	0.000872924
HSAC011010	OPCML	0.444	anova	0.00114275		HSAC012245	PLA2G6	-0.441	anova	0.000759304
HSAC011711	SAR1A	0.444	anova	0.000983158		HSAC011797	KBTBD6	-0.437	anova	0.000829719
HSAC010678	PLCD3	0.442	anova	0.000977363		HSAC017835	RBM11	-0.437	anova	0.000791797
HSAC010705	DHX29	0.442	anova	0.00079302		HSAC008834	DARS	-0.43	anova	0.00113037
HSAC019078	CASC4	0.439	anova	0.000837575		HSAC016303	NPIP	-0.426	anova	0.00129254
HSAC011009	MAS1	0.43	anova	0.00107653		HSAC001603	UBAP2L	-0.421	anova	0.0015811
HSAC017763	BCL2L10	0.426	anova	0.00124312		HSAC002448	RHOD	-0.42	anova	0.00158594
HSAC009415	COQ10B	0.42	anova	0.00153173		HSAC017003	LGTN	-0.42	anova	0.00162516
HSAC017769	CMTM6	0.418	anova	0.00153968		HSAC001435	AC002115,6	-0.419	anova	0.0015007
HSAC006389	MYL6	0.417	anova	0.00154008		HSAC013330	AC068288,1	-0.417	anova	0.00153182
HSAC017792	ENY2	0.416	anova	0.00158618		HSAC004707	PNN	-0.415	anova	0.00161296
HSAC008408	RP11-884K10,5	0.414	anova	0.00159225		HSAC001092	SEC16A	-0.413	anova	0.00164231
HSAC014083	CANX	0.412	anova	0.00165411		HSAC015158	RP11-111G23,1	-0.413	anova	0.00166037
HSAC004281	BLOC1S2	0.411	anova	0.00170834		HSAC020121	WASF2	-0.413	anova	0.00161955
HSAC012013	KBTBD8	0.41	anova	0.00177177		HSAC003631	D2HGDH	-0.409	anova	0.00176594
HSAC006652	TRMT112	0.409	anova	0.00177878		HSAC016724	EXOC7	-0.408	anova	0.00180319
HSAC012536	HPS6	0.408	anova	0.0017394		HSAC002012	FOXK1	-0.407	anova	0.00175087
HSAC016234	MYADM	0.408	anova	0.00176934		HSAC017234	ATG9B	-0.407	anova	0.00175331
HSAC000186	FCER1G	0.406	anova	0.00172317		HSAC009937	CCDC144A	-0.403	anova	0.00177473
HSAC002682	TNFAIP8	0.406	anova	0.00174015		HSAC001775	ZNF202	-0.402	anova	0.00186179
HSAC005147	EHD4	0.406	anova	0.00169997		HSAC018215	GPR84	-0.4	anova	0.00197836
HSAC008417	MRPS16	0.406	anova	0.0017306		HSAC006330	GANAB	-0.398	anova	0.00205184
HSAC000878	TRAM1	0.405	anova	0.00173952		HSAC009432	PMS2L2	-0.397	anova	0.00213801
HSAC003754	MED31	0.405	anova	0.00170583		HSAC007023	LOXL2	-0.394	anova	0.00238149
HSAC004071	SIRT1	0.404	anova	0.00171349		HSAC004035	C2orf29	-0.392	anova	0.00261179
HSAC010673	C1QC	0.403	anova	0.00178113		HSAC019186	C16orf70	-0.39	anova	0.00265558
HSAC008576	RBP2	0.401	anova	0.00190755		HSAC020880	ORC4L	-0.39	anova	0.00265529
HSAC005746	TIGD5	0.4	anova	0.00197353		HSAC007699	POLE	-0.389	anova	0.00274272
HSAC016541	DPH3	0.4	anova	0.00200559		HSAC001093	NCAPD2	-0.388	anova	0.00284767
HSAC001375	PLEKHO2	0.399	anova	0.00202926		HSAC005334	SNORD107	-0.388	anova	0.00287224
HSAC008814	AC174470,1	0.399	anova	0.00201225		HSAC001414	ASRGL1	-0.387	anova	0.00294422
HSAC006912	POP4	0.398	anova	0.00203633		HSAC000847	DUSP7	-0.386	anova	0.00301282
HSAC008351	TMED3	0.398	anova	0.00204534		HSAC021100	DZIP1L	-0.386	anova	0.00300988
HSAC008134	DCBLD2	0.395	anova	0.00229605		HSAC001313	FNBP4	-0.385	anova	0.00302745
HSAC019018	C18orf32	0.395	anova	0.00224513		HSAC003497	MAN1A1	-0.384	anova	0.00310697
HSAC001139	FEM1B	0.394	anova	0.0023362		HSAC004632	SFRS16	-0.384	anova	0.00307823
HSAC003389	ATP6V0E1	0.391	anova	0.00266933		HSAC018290	CMTM8	-0.384	anova	0.00306536
HSAC003685	ABLIM3	0.391	anova	0.00265939		HSAC000887	MRPL37	-0.382	anova	0.00324906
HSAC006348	MAML1	0.391	anova	0.00269703		HSAC019594	SMCR8	-0.382	anova	0.00322433
HSAC009417	C3orf58	0.388	anova	0.00283788		HSAC004564	ZNF85	-0.381	anova	0.00335521
HSAC001862	TYROBP	0.387	anova	0.0029797		HSAC008754	UPK3B	-0.38	anova	0.00350725
HSAC015752	PEF1	0.387	anova	0.00295455		HSAC017340	DHX15	-0.38	anova	0.00345693
HSAC011156	ISLR	0.386	anova	0.00300693		HSAC004980	CCL25	-0.379	anova	0.00351204
HSAC011916	TLR5	0.385	anova	0.00305076		HSAC003426	KIAA0907	-0.378	anova	0.00358385
HSAC001218	C8orf83	0.384	anova	0.00308271		HSAC018605	AC008073,1	-0.377	anova	0.00374675
HSAC009022	HECW1	0.384	anova	0.00309234		HSAC000761	CYLC2	-0.376	anova	0.00376679
HSAC008663	SSPN	0.383	anova	0.00307406		HSAC001763	PDCL	-0.376	anova	0.00378776
HSAC012930	ZNF432	0.382	anova	0.00330702		HSAC015654	SNORA48	-0.376	anova	0.00380662
HSAC019887	CACNA2D3	0.381	anova	0.00333125		HSAC000862	PRPF4	-0.375	anova	0.00393037
HSAC011565	UBE2D2	0.38	anova	0.00347187		HSAC020346	DNASE1	-0.375	anova	0.0039201
HSAC002232	ORMDL2	0.379	anova	0.00349879		HSAC014749	RAB3GAP2	-0.374	anova	0.00394576
HSAC006686	LMOD1	0.379	anova	0.00351366		HSAC006543	SLC25A3	-0.373	anova	0.00411962
HSAC002512	SNX11	0.378	anova	0.00360874		HSAC003332	DNMBP	-0.372	anova	0.00412844
HSAC003381	SCYL3	0.378	anova	0.00360495		HSAC002706	NNT	-0.371	anova	0.00429789
HSAC009230	PHF23	0.378	anova	0.00358279		HSAC004653	AC139530,1	-0.371	anova	0.00430246
HSAC002354	ICOSLG	0.377	anova	0.00373746		HSAC005027	CAMP	-0.371	anova	0.00430584
HSAC004490	OSGIN2	0.376	anova	0.0037859		HSAC007250	AC020915,1	-0.371	anova	0.00430207
HSAC014306	TCEB1	0.375	anova	0.00392226		HSAC019830	HMBOX1	-0.371	anova	0.00430093
HSAC004409	C18orf21	0.374	anova	0.00397053		HSAC016390	WNK2	-0.37	anova	0.0042992
HSAC014007	CCDC90B	0.374	anova	0.00398139		HSAC018646	TMEM212	-0.37	anova	0.00429794
HSAC019678	RNASEH2C	0.374	anova	0.00397041		HSAC000785	ERAL1	-0.369	anova	0.00448752
HSAC001428	DDX50	0.373	anova	0.00410729		HSAC003830	RP1-90K10,3	-0.368	anova	0.00462164
HSAC002708	ARRB2	0.373	anova	0.00409667		HSAC009274	XXyac-R12DG2,2	-0.367	anova	0.00479862
HSAC016576	DYNLT1	0.373	anova	0.00406042		HSAC002611	LUC7L	-0.366	anova	0.00480751
HSAC017066	ACTR10	0.373	anova	0.0040765		HSAC005030	TNFRSF10B	-0.366	anova	0.00486418
HSAC004074	SCAMP1	0.37	anova	0.00428863		HSAC017232	C3orf49	-0.366	anova	0.00479429
HSAC014028	EHD1	0.37	anova	0.0042983		HSAC000235	CLC	-0.365	anova	0.00491332
HSAC017502	PJA2	0.37	anova	0.00427564		HSAC005157	CELSR3	-0.365	anova	0.00487759
HSAC018162	BCL7C	0.369	anova	0.00442073		HSAC007102	UBE2I	-0.365	anova	0.00486481
HSAC017410	MGP	0.368	anova	0.00460026		HSAC001706	CWC25	-0.364	anova	0.00496473
HSAC013140	CST3	0.367	anova	0.0047515		HSAC016489	PITRM1	-0.364	anova	0.00497917
HSAC015598	SLC15A3	0.367	anova	0.0047311		HSAC017386	AC015871,1	-0.364	anova	0.00493689
HSAC015785	SLC17A6	0.367	anova	0.00481789		HSAC011869	SNAPC4	-0.363	anova	0.00512011
HSAC006317	CEBPD	0.366	anova	0.0048258		HSAC017056	CPT2	-0.362	anova	0.00524446
HSAC010460	C11orf10	0.366	anova	0.00479632		HSAC021190	AC018696,2	-0.361	anova	0.0054673
HSAC012031	AC138655,6	0.366	anova	0.00485008		HSAC019081	AL669831,1	-0.36	anova	0.00562647
HSAC007671	KRT76	0.365	anova	0.00484958		HSAC017793	EXOSC5	-0.358	anova	0.00584429
HSAC010997	ELANE	0.365	anova	0.00489124		HSAC018572	POLD2	-0.358	anova	0.00582757
HSAC002724	C1orf54	0.364	anova	0.00498144		HSAC004353	ATP4A	-0.357	anova	0.00596172
HSAC011311	DCUN1D1	0.364	anova	0.00495138		HSAC005858	SRSF1	-0.357	anova	0.00604284
HSAC011479	ANAPC13	0.364	anova	0.00499901		HSAC012833	XRCC2	-0.357	anova	0.00598086
HSAC003890	PURA	0.363	anova	0.00511805		HSAC015526	GMNN	-0.357	anova	0.00594318
HSAC007786	SERTAD3	0.363	anova	0.00512462		HSAC019750	ZFP42	-0.357	anova	0.00593946
HSAC017542	TIMM8B	0.363	anova	0.00510751		HSAC001589	TMEM8B	-0.356	anova	0.00613458
HSAC019087	MAF1	0.362	anova	0.00518878		HSAC004237	OGFOD2	-0.356	anova	0.00599501
HSAC002803	MFSD5	0.361	anova	0.00538509		HSAC004371	INSL3	-0.356	anova	0.00601686
HSAC008031	MGAT2	0.361	anova	0.00547649		HSAC007194	YTHDC1	-0.356	anova	0.00614646
HSAC010984	XRCC3	0.361	anova	0.00550047		HSAC004277	TUBE1	-0.355	anova	0.00618425
HSAC005744	SPG21	0.36	anova	0.00562626		HSAC004421	C8B	-0.355	anova	0.00614974
HSAC011770	MGST3	0.36	anova	0.00560061		HSAC018874	PARP6	-0.355	anova	0.00619539
HSAC011913	COX7A1	0.36	anova	0.00561353		HSAC020447	AC008268,3	-0.355	anova	0.00616279
HSAC020732	AARSD1	0.36	anova	0.00559036		HSAC014453	SUGP2	-0.354	anova	0.00618483
HSAC001864	TNS1	0.359	anova	0.00577072		HSAC013877	RP11-163O17,1	-0.353	anova	0.00640814
HSAC008665	NDUFB1	0.359	anova	0.00575722		HSAC015655	TIA1	-0.353	anova	0.00638873
HSAC009226	KPNA4	0.359	anova	0.00567642		HSAC015829	RBP5	-0.353	anova	0.0063939
HSAC008382	UBTD2	0.358	anova	0.005808		HSAC004006	KIAA0556	-0.352	anova	0.00672074
HSAC011887	CNBP	0.358	anova	0.00581893		HSAC006987	AMPD2	-0.352	anova	0.00674861
HSAC018762	ATP5H	0.358	anova	0.00595669		HSAC000738	KARS	-0.351	anova	0.00678573
HSAC015882	GPR52	0.357	anova	0.00595408		HSAC003189	GABRE	-0.351	anova	0.00698534
HSAC017579	CCNJ	0.357	anova	0.00600154		HSAC019655	SFRS18	-0.35	anova	0.00716937
HSAC004690	SERTAD1	0.356	anova	0.00614759		HSAC012813	SLC30A5	-0.349	anova	0.00715345
HSAC020454	RAF1	0.356	anova	0.00612995		HSAC018346	TIGD1L	-0.349	anova	0.00715115
HSAC000208	HNRNPF	0.355	anova	0.00615448		HSAC021264	OR8D1	-0.349	anova	0.00717118
HSAC001808	RRAS	0.355	anova	0.00616239		HSAC000427	ASCL1	-0.348	anova	0.00741026
HSAC006948	THAP11	0.355	anova	0.00617469		HSAC002046	NR0B2	-0.348	anova	0.00737658
HSAC008652	NOL6	0.355	anova	0.00614232		HSAC009372	CIDEB	-0.348	anova	0.00738495
HSAC014791	NDUFB8	0.355	anova	0.00615653		HSAC001396	USP24	-0.347	anova	0.00766941
HSAC010327	ARF6	0.354	anova	0.00636953		HSAC002460	NOP2	-0.347	anova	0.00755473
HSAC010755	ZBBX	0.354	anova	0.00619169		HSAC013986	LHB	-0.347	anova	0.00764675
HSAC019940	EXOSC4	0.354	anova	0.0062113		HSAC011972	KNTC1	-0.346	anova	0.00782931
HSAC007575	NDUFA2	0.353	anova	0.006538		HSAC018538	ACTR2	-0.346	anova	0.00778858
HSAC014443	TMEM176B	0.353	anova	0.00641582		HSAC002341	SIN3B	-0.345	anova	0.00803236
HSAC017312	PTPN18	0.352	anova	0.00652771		HSAC013819	RRP1B	-0.345	anova	0.00822812
HSAC021145	RP11-187C18,3	0.352	anova	0.00651921		HSAC000003	CEACAM3	-0.344	anova	0.00838551
HSAC012126	HK1	0.351	anova	0.00696826		HSAC013361	TRIM56	-0.344	anova	0.00843338
HSAC001176	CORO1B	0.35	anova	0.00711487		HSAC021134	C3orf30	-0.344	anova	0.00843555
HSAC002001	RABAC1	0.35	anova	0.00719142		HSAC008347	SNAPC1	-0.343	anova	0.00851125
HSAC005151	MRPS28	0.35	anova	0.00706389		HSAC010520	GNAZ	-0.343	anova	0.00852064
HSAC005821	STAT2	0.35	anova	0.00715501		HSAC016520	TRMT2B	-0.343	anova	0.00857372
HSAC006657	LHFPL2	0.35	anova	0.00713774		HSAC013989	ACO1	-0.342	anova	0.00884267
HSAC000600	DUSP4	0.349	anova	0.00713264		HSAC014192	HSPA8	-0.342	anova	0.00884268
HSAC008250	DYNC1H1	0.349	anova	0.00716868		HSAC000335	C9	-0.341	anova	0.00918526
HSAC014274	SNAP23	0.349	anova	0.00729292		HSAC002205	MYSM1	-0.341	anova	0.00916931
HSAC002561	GLIS2	0.348	anova	0.00730881		HSAC016982	PAN2	-0.341	anova	0.00920258
HSAC007980	SKP1	0.348	anova	0.00738427		HSAC009461	AC145146,1	-0.34	anova	0.00947584
HSAC001807	TNKS1BP1	0.346	anova	0.00788362		HSAC020424	WASH4P	-0.34	anova	0.00927675
HSAC002981	RP4-761I2,2	0.346	anova	0.00778258		HSAC002449	TAOK1	-0.339	anova	0.00960327
HSAC005551	GLIPR1	0.346	anova	0.00782401		HSAC010020	TMTC2	-0.339	anova	0.00966257
HSAC001727	TMEM50B	0.345	anova	0.00826104		HSAC004770	LYL1	-0.338	anova	0.00972457
HSAC010087	SOX18	0.345	anova	0.00824255		HSAC008392	ARGLU1	-0.338	anova	0.00971126
HSAC002806	AC091196,1	0.344	anova	0.00848396		HSAC009529	WDR85	-0.338	anova	0.00971127
HSAC003859	SSR3	0.343	anova	0.00859165		HSAC017317	GALNT3	-0.338	anova	0.00969209
HSAC009533	RBP7	0.343	anova	0.00859247		HSAC019672	LARP1	-0.338	anova	0.00972907
HSAC012742	CESK1	0.343	anova	0.0085411		HSAC002073	WDR13	-0.337	anova	0.00998501
HSAC015701	C6orf72	0.343	anova	0.00855037		HSAC006753	KRT15	-0.337	anova	0.00989581
HSAC011690	EXOC6	0.342	anova	0.00892765		HSAC009724	AL133153,1	-0.337	anova	0.00988162
HSAC003590	PTPRA	0.341	anova	0.00925322		HSAC014181	PSG8	-0.337	anova	0.00991507
HSAC004061	TBCB	0.341	anova	0.00920342		HSAC017210	KCNMB3	-0.337	anova	0.0100566
HSAC012614	VPS4B	0.341	anova	0.00923777		HSAC005612	SENP1	-0.335	anova	0.0106116
HSAC005861	CR2	0.34	anova	0.00929614		HSAC006785	MTRF1	-0.335	anova	0.0105331
HSAC009900	U47924,1	0.34	anova	0.00925605		HSAC008172	FZD7	-0.335	anova	0.0106195
HSAC019869	TRMT61A	0.34	anova	0.00947101		HSAC008837	MLXIPL	-0.335	anova	0.0105843
HSAC002282	STARD3NL	0.339	anova	0.00969606		HSAC008949	TMF1	-0.335	anova	0.0106223
HSAC002443	THTPA	0.339	anova	0.00969941		HSAC021216	TBRG1	-0.335	anova	0.0106104
HSAC003846	RASSF8	0.339	anova	0.00967855		HSAC014799	SRC	-0.334	anova	0.0105806
HSAC006341	FBXO8	0.339	anova	0.00963139		HSAC002801	CDK2	-0.333	anova	0.0110171
HSAC007249	MARK2	0.339	anova	0.00970712		HSAC004627	AK3	-0.333	anova	0.0110494
HSAC012632	ADAM29	0.339	anova	0.0096272		HSAC005771	PRSS21	-0.333	anova	0.0110487
HSAC017717	C11orf73	0.339	anova	0.00966211		HSAC006864	POLA2	-0.333	anova	0.0109448
HSAC000052	DARC	0.338	anova	0.00968782		HSAC011818	AMH	-0.333	anova	0.0109306
HSAC003632	EPB41L1	0.338	anova	0.00971924		HSAC020792	AL354696,2	-0.333	anova	0.0110037
HSAC013762	GMFB	0.338	anova	0.00973739		HSAC000096	FOLR3	-0.332	anova	0.0111281
HSAC013977	CYP1B1	0.338	anova	0.00970848		HSAC002978	GATAD1	-0.332	anova	0.0111223
HSAC002843	ECD	0.337	anova	0.0100628		HSAC006225	LETMD1	-0.332	anova	0.0111128
HSAC005734	SLC38A6	0.337	anova	0.010035		HSAC007441	BAAT	-0.332	anova	0.0111649
HSAC001279	COPS4	0.336	anova	0.01027		HSAC011400	TBC1D3H	-0.332	anova	0.0111964
HSAC005437	GFOD1	0.336	anova	0.0102622		HSAC005902	CLK3	-0.331	anova	0.0113431
HSAC006153	CD58	0.336	anova	0.0102845		HSAC014385	WSB1	-0.331	anova	0.0113892
HSAC009308	DBF4B	0.336	anova	0.0104099		HSAC017179	SULT1A3	-0.331	anova	0.0113644
HSAC012113	CDKL3	0.336	anova	0.0103256		HSAC001976	ERRFI1	-0.33	anova	0.0116107
HSAC001328	RBM18	0.335	anova	0.0104148		HSAC007746	ZHX3	-0.33	anova	0.0115178
HSAC001540	DNAJB12	0.335	anova	0.0105109		HSAC009291	CEP152	-0.33	anova	0.0115383
HSAC013832	PAF1	0.335	anova	0.010633		HSAC009484	SSX4	-0.33	anova	0.0116003
HSAC003318	CLEC4M	0.334	anova	0.0105558		HSAC017631	RPA4	-0.33	anova	0.0115992
HSAC004215	PLXDC2	0.334	anova	0.0108923		HSAC000597	ADCY2	-0.329	anova	0.0117461
HSAC013559	KCNE1L	0.334	anova	0.0109055		HSAC004612	ZNF273	-0.329	anova	0.0118521
HSAC017558	LMCD1	0.334	anova	0.0106883		HSAC006673	TFDP1	-0.329	anova	0.0118183
HSAC006976	CETN2	0.333	anova	0.0109093		HSAC007974	SCML2	-0.329	anova	0.0118534
HSAC010270	GPR18	0.333	anova	0.0109053		HSAC014746	SRRM2	-0.329	anova	0.0117127
HSAC012819	UBE2D1	0.333	anova	0.0110312		HSAC015492	VPS11	-0.329	anova	0.0118464
HSAC019707	CPM	0.333	anova	0.0109218		HSAC016521	SEMA6A	-0.329	anova	0.0117348
HSAC001616	TUSC2	0.332	anova	0.0111105		HSAC005029	GNAT1	-0.328	anova	0.0121062
HSAC007163	DNTTIP2	0.332	anova	0.0111013		HSAC008361	SLC25A29	-0.328	anova	0.0120899
HSAC008403	POLB	0.332	anova	0.0111091		HSAC021302	RBM8A	-0.328	anova	0.0121207
HSAC008674	SLC22A2	0.332	anova	0.0111192		HSAC001229	AL772208,1	-0.327	anova	0.0123344
HSAC018858	RP5-907D15,2	0.332	anova	0.0110935		HSAC002845	SLC17A2	-0.327	anova	0.012292
HSAC019146	MS4A4A	0.332	anova	0.0111239		HSAC003981	PHF7	-0.327	anova	0.0122218
HSAC002732	DNAJC30	0.331	anova	0.0113728		HSAC004032	HOOK2	-0.327	anova	0.0123316
HSAC003514	ZC3H7B	0.331	anova	0.0113952		HSAC008011	TROAP	-0.327	anova	0.0122298
HSAC005618	CCDC85B	0.331	anova	0.0113492		HSAC008373	EVI5	-0.327	anova	0.012315
HSAC017773	MRPL1	0.331	anova	0.011254		HSAC016405	ILF3	-0.327	anova	0.0122361
HSAC006873	TGFBR2	0.33	anova	0.011673		HSAC018522	RP11-25C19,1	-0.327	anova	0.0123535
HSAC008045	LENG1	0.33	anova	0.0115804		HSAC000937	CCNL1	-0.326	anova	0.0124588
HSAC009515	TMEM219	0.33	anova	0.0115103		HSAC017266	PDAP1	-0.326	anova	0.0123804
HSAC010085	ANAPC5	0.33	anova	0.0115767		HSAC020457	IGFBPL1	-0.326	anova	0.01264
HSAC010517	RAPGEF4	0.33	anova	0.0115962		HSAC000922	REC8	-0.325	anova	0.0129236
HSAC012208	STX8	0.33	anova	0.0116081		HSAC007881	PREX2	-0.325	anova	0.0127832
HSAC001938	NDUFS4	0.329	anova	0.011847		HSAC019002	AHSA2	-0.325	anova	0.0127987
HSAC008538	ATXN7L3	0.329	anova	0.0118368		HSAC006230	KIAA0182	-0.324	anova	0.0132515
HSAC011617	SDAD1	0.329	anova	0.0118753		HSAC009294	AL356057,1	-0.324	anova	0.0131111
HSAC012928	MYCBPAP	0.329	anova	0.0118795		HSAC017803	GCFC1	-0.324	anova	0.0131331
HSAC006981	DAD1	0.328	anova	0.0120876		HSAC018788	ZNF765	-0.324	anova	0.0131506
HSAC008563	ARL3	0.328	anova	0.0121055		HSAC002328	SLC25A20	-0.323	anova	0.0135338
HSAC011849	UCMA	0.328	anova	0.0121177		HSAC003604	KIAA0649	-0.323	anova	0.0137042
HSAC016596	KBTBD4	0.328	anova	0.0119878		HSAC004025	GTF2H3	-0.323	anova	0.0135602
HSAC000163	NDUFB7	0.327	anova	0.0123252		HSAC014568	AL157877,1	-0.323	anova	0.0134901
HSAC000239	CD48	0.327	anova	0.0123582		HSAC002990	RPH3A	-0.322	anova	0.014159
HSAC004932	C21orf91	0.327	anova	0.012332		HSAC019844	ARHGEF2	-0.322	anova	0.0139818
HSAC017285	MATN4	0.327	anova	0.0123357		HSAC004539	ESM1	-0.321	anova	0.0145421
HSAC008148	ZFR	0.326	anova	0.0127177		HSAC012370	CCDC122	-0.32	anova	0.0147613
HSAC011450	TXNDC15	0.326	anova	0.0127336		HSAC013345	TTF2	-0.32	anova	0.0147654
HSAC011566	TMEM126A	0.326	anova	0.0123801		HSAC021200	AC091849,1	-0.32	anova	0.0148164
HSAC017221	ACSBG1	0.326	anova	0.0125559		HSAC001757	ATP13A1	-0.319	anova	0.0150633
HSAC000415	NCF1C	0.325	anova	0.012794		HSAC005994	MAPKAPK2	-0.319	anova	0.0151216
HSAC001327	RNF13	0.325	anova	0.0130249		HSAC017140	AL160060,1	-0.319	anova	0.015126
HSAC006956	SNRPB2	0.325	anova	0.0127664		HSAC018267	UBE2D3	-0.319	anova	0.0150651
HSAC007397	TMSB4Y	0.325	anova	0.0127479		HSAC020159	SLC9A2	-0.318	anova	0.0154437
HSAC007846	CNN2	0.325	anova	0.0130325		HSAC002684	PPM1G	-0.317	anova	0.0160095
HSAC009898	C8orf30B	0.325	anova	0.0130491		HSAC003664	LARP4	-0.317	anova	0.0159871
HSAC004558	SPCS3	0.324	anova	0.0131234		HSAC004840	GLDN	-0.317	anova	0.0159776
HSAC006906	MYST3	0.324	anova	0.0131426		HSAC012814	KIAA1984	-0.317	anova	0.0157646
HSAC008793	NSMCE1	0.324	anova	0.0133316		HSAC006102	QDPR	-0.316	anova	0.0166509
HSAC013344	ZNF443	0.324	anova	0.0133066		HSAC006605	TAZ	-0.316	anova	0.0165007
HSAC015756	CALHM2	0.324	anova	0.0133236		HSAC016539	FKBP14	-0.316	anova	0.0165513
HSAC002399	DUSP11	0.323	anova	0.013385		HSAC014963	SGTA	-0.315	anova	0.0169341
HSAC006086	SLA	0.323	anova	0.0133996		HSAC015941	OR10C1	-0.315	anova	0.0168382
HSAC002033	SIGIRR	0.322	anova	0.0140064		HSAC017588	PECR	-0.315	anova	0.016915
HSAC011008	CD70	0.322	anova	0.0139961		HSAC001192	DAK	-0.314	anova	0.0174793
HSAC012209	NPC2	0.322	anova	0.0139643		HSAC008537	CSNK1G2	-0.313	anova	0.0176147
HSAC021308	SNF8	0.322	anova	0.0139958		HSAC009475	GM2A	-0.313	anova	0.017851
HSAC002369	S100A13	0.321	anova	0.0144169		HSAC015923	HIST1H2BG	-0.313	anova	0.0177415
HSAC004680	FAM82B	0.321	anova	0.0144912		HSAC017962	PMS2L3	-0.313	anova	0.0178586
HSAC007758	UBE2Z	0.321	anova	0.0145304		HSAC016526	NUDC	-0.312	anova	0.0179972
HSAC011976	HS3ST2	0.321	anova	0.0145186		HSAC016717	SQLE	-0.312	anova	0.0180306
HSAC014207	RAB33B	0.321	anova	0.0144167		HSAC021176	GATS	-0.312	anova	0.0179205
HSAC019613	HVCN1	0.321	anova	0.0144198		HSAC021177	FGA	-0.312	anova	0.0178666
HSAC000204	TRIM23	0.32	anova	0.0148506		HSAC000822	DLL4	-0.311	anova	0.0184179
HSAC002861	SYF2	0.32	anova	0.0146786		HSAC010606	DFNB31	-0.311	anova	0.01839
HSAC005282	RG9MTD1	0.32	anova	0.0146302		HSAC012561	HS1BP3	-0.311	anova	0.0184106
HSAC006559	HSPB2	0.32	anova	0.0147949		HSAC015360	C7orf16	-0.311	anova	0.0183121
HSAC007222	RAP1B	0.32	anova	0.0145868		HSAC016468	KLRC3	-0.311	anova	0.0183601
HSAC018687	IL1F10	0.32	anova	0.0147837		HSAC000300	THPO	-0.31	anova	0.0187355
HSAC002686	CABLES1	0.319	anova	0.0149579		HSAC000363	PSMB2	-0.31	anova	0.0188657
HSAC007492	GLT8D2	0.319	anova	0.015175		HSAC003235	ACAD11	-0.31	anova	0.0187136
HSAC017426	APLP2	0.319	anova	0.0152979		HSAC014748	ZNF14	-0.31	anova	0.0185925
HSAC019433	MAML2	0.319	anova	0.0151959		HSAC003477	TMEM107	-0.309	anova	0.0190904
HSAC002375	EXOSC1	0.318	anova	0.0153254		HSAC009621	ADH6	-0.309	anova	0.0192687
HSAC002646	CORO1C	0.318	anova	0.0153355		HSAC012767	TMEM199	-0.309	anova	0.0192821
HSAC007391	ARHGDIA	0.318	anova	0.0152994		HSAC016957	NSUN5	-0.309	anova	0.0191144
HSAC010972	SPINK5L3	0.318	anova	0.0153666		HSAC021165	MED13	-0.309	anova	0.0192401
HSAC013181	FOXE1	0.318	anova	0.015605		HSAC000012	CEACAM8	-0.308	anova	0.0196134
HSAC016201	C19orf63	0.318	anova	0.0156173		HSAC001256	DEAF1	-0.308	anova	0.0195794
HSAC003543	DAPK3	0.317	anova	0.0161802		HSAC006017	PFKM	-0.308	anova	0.0197655
HSAC011102	RNF207	0.317	anova	0.0161138		HSAC006879	MDK	-0.308	anova	0.0196398
HSAC001012	GMFG	0.316	anova	0.0167163		HSAC014517	FAM122C	-0.308	anova	0.0196976
HSAC006848	NME3	0.316	anova	0.0165574		HSAC020826	AC092384,2	-0.308	anova	0.0196748
HSAC011321	IGF1R	0.316	anova	0.0166253		HSAC001028	PRPF38A	-0.307	anova	0.0202146
HSAC012135	SDF2	0.316	anova	0.0165625		HSAC001212	TMCC2	-0.307	anova	0.0198725
HSAC001478	TTC1	0.315	anova	0.0169675		HSAC003282	MRPS25	-0.307	anova	0.0199208
HSAC004451	TCEAL3	0.315	anova	0.0169245		HSAC007312	CHD5	-0.307	anova	0.0202008
HSAC005284	CCL21	0.315	anova	0.0168061		HSAC014707	SF3B3	-0.307	anova	0.0198901
HSAC006194	TAGLN	0.315	anova	0.0168215		HSAC017839	RP5-854E16,1	-0.307	anova	0.020163
HSAC014289	PAFAH1B2	0.315	anova	0.0168112		HSAC020054	TP53	-0.307	anova	0.0198886
HSAC015537	GRAMD3	0.315	anova	0.016901		HSAC001882	DDX56	-0.306	anova	0.0202837
HSAC016922	GPLD1	0.315	anova	0.0168663		HSAC004253	ABCC13	-0.306	anova	0.0205814
HSAC019703	DOT1L	0.315	anova	0.0169834		HSAC008874	AC091565,3	-0.306	anova	0.0202724
HSAC000792	COX7C	0.314	anova	0.0170955		HSAC000823	MMP24	-0.305	anova	0.0209295
HSAC010638	PCSK5	0.314	anova	0.0170904		HSAC003237	MED24	-0.305	anova	0.0209966
HSAC015303	PTPRT	0.314	anova	0.0173365		HSAC006881	CITED2	-0.305	anova	0.0208534
HSAC016067	FFAR1	0.314	anova	0.0175441		HSAC010769	HDGFL1	-0.305	anova	0.0210197
HSAC017647	IER3IP1	0.314	anova	0.0174269		HSAC011709	TGOLN2	-0.305	anova	0.0209068
HSAC000793	RPS23	0.313	anova	0.0178275		HSAC001617	CLRN1OS	-0.304	anova	0.0213434
HSAC001470	MFSD3	0.313	anova	0.0177501		HSAC001989	CEP97	-0.304	anova	0.0212891
HSAC004981	RB1CC1	0.313	anova	0.0178309		HSAC002266	COG3	-0.304	anova	0.0215334
HSAC014293	WNK1	0.313	anova	0.0178528		HSAC005001	SETD4	-0.304	anova	0.0212862
HSAC015200	AP4E1	0.313	anova	0.0176257		HSAC007461	PTPRS	-0.304	anova	0.0213151
HSAC015909	RP4-581F12,2	0.313	anova	0.0176614		HSAC009221	SECISBP2	-0.304	anova	0.0212811
HSAC016266	HSBP1	0.313	anova	0.0178816		HSAC013547	CPNE7	-0.304	anova	0.0213017
HSAC017314	DNAJB11	0.313	anova	0.0178745		HSAC015128	ADAMTS4	-0.304	anova	0.0212618
HSAC019395	LSMD1	0.313	anova	0.0178583		HSAC020366	SIGLEC8	-0.304	anova	0.0212742
HSAC020100	PSMA3	0.313	anova	0.0177542		HSAC006767	SNRPA1	-0.303	anova	0.0221906
HSAC000056	TSPO	0.312	anova	0.0182635		HSAC011451	CNTNAP2	-0.303	anova	0.0221283
HSAC000968	TOB2	0.312	anova	0.0182822		HSAC002674	RNF213	-0.302	anova	0.0222094
HSAC001082	RAB6A	0.312	anova	0.0179087		HSAC009713	AC126564,1	-0.302	anova	0.0226478
HSAC003601	PIGY	0.312	anova	0.017969		HSAC007157	NLE1	-0.301	anova	0.0231134
HSAC011631	LXN	0.312	anova	0.0180168		HSAC008478	EIF4H	-0.301	anova	0.0233937
HSAC011663	C11orf59	0.312	anova	0.0178858		HSAC013368	TFDP3	-0.301	anova	0.0234249
HSAC000895	C15orf24	0.311	anova	0.0183969		HSAC015178	CDK11A	-0.301	anova	0.0229586
HSAC002121	GLT1D1	0.311	anova	0.0184442		HSAC020559	GPD1	-0.301	anova	0.0230853
HSAC003702	C2CD2L	0.311	anova	0.0184015		HSAC000965	SMG5	-0.3	anova	0.0237329
HSAC004650	ZNF280B	0.311	anova	0.0183774		HSAC008602	INPP5B	-0.3	anova	0.0235275
HSAC005668	LY96	0.311	anova	0.0183692		HSAC008712	ZCCHC7	-0.3	anova	0.0234849
HSAC007013	FABP4	0.311	anova	0.0183492		HSAC013357	RRN3P3	-0.3	anova	0.0238052
HSAC007143	LIPA	0.311	anova	0.0182592		HSAC005050	ANAPC7	-0.299	anova	0.0245051
HSAC008426	SRP14	0.311	anova	0.0182832		HSAC008464	RBM25	-0.299	anova	0.0245491
HSAC010062	KIAA1539	0.311	anova	0.0183109		HSAC016416	RASSF3	-0.299	anova	0.0244267
HSAC011933	GRK4	0.311	anova	0.0182579		HSAC019051	MAGT1	-0.299	anova	0.0245149
HSAC012949	TTTY7	0.311	anova	0.018372		HSAC020141	PANK3	-0.299	anova	0.0245257
HSAC013826	MRPL11	0.311	anova	0.0184709		HSAC001183	IRGQ	-0.298	anova	0.0248545
HSAC008664	ATP6AP2	0.31	anova	0.0188535		HSAC003921	CREBZF	-0.298	anova	0.0247984
HSAC019475	WIBG	0.31	anova	0.01872		HSAC007779	ITGAV	-0.297	anova	0.0252688
HSAC000375	GAA	0.309	anova	0.0191661		HSAC015180	SLC35E2B	-0.297	anova	0.0250875
HSAC007633	TSSC4	0.309	anova	0.0191883		HSAC017894	RNF34	-0.297	anova	0.025344
HSAC008291	ARHGAP15	0.309	anova	0.01924		HSAC004745	NEUROD6	-0.295	anova	0.0265773
HSAC008650	ICMT	0.309	anova	0.0191521		HSAC017007	EXOSC8	-0.295	anova	0.0271016
HSAC016449	GTF2B	0.309	anova	0.019366		HSAC001991	TMPO	-0.294	anova	0.0278673
HSAC018913	CC2D1B	0.309	anova	0.0192129		HSAC004929	RHBDD1	-0.294	anova	0.0273424
HSAC001393	NOSIP	0.308	anova	0.0196134		HSAC005113	HAUS6	-0.294	anova	0.027325
HSAC001974	HLA-DOA	0.308	anova	0.0196747		HSAC005862	VEGFA	-0.294	anova	0.0279169
HSAC002091	C3orf59	0.308	anova	0.0194877		HSAC011769	SRRT	-0.294	anova	0.0279216
HSAC006393	FCGR1A	0.308	anova	0.0195145		HSAC012434	ARID1A	-0.294	anova	0.0271713
HSAC008632	THAP4	0.308	anova	0.0194792		HSAC000372	F11	-0.293	anova	0.0284564
HSAC012074	FER	0.308	anova	0.0196179		HSAC004356	ASIP	-0.293	anova	0.0281152
HSAC012381	LPAR2	0.308	anova	0.0195863		HSAC010588	LZTS1	-0.293	anova	0.0282967
HSAC016934	ATP6V1D	0.308	anova	0.019607		HSAC015110	SMAD3	-0.293	anova	0.0281989
HSAC001975	RNF181	0.307	anova	0.0199333		HSAC015766	DNMT3A	-0.293	anova	0.0282333
HSAC004681	HPSE	0.307	anova	0.0199406		HSAC016605	ATP6V0A1	-0.293	anova	0.0285045
HSAC006817	COX8A	0.307	anova	0.019925		HSAC020884	DCTN3	-0.293	anova	0.0279709
HSAC008651	RPP21	0.307	anova	0.0202499		HSAC001643	FAM110C	-0.292	anova	0.0287539
HSAC011466	ATP2C1	0.307	anova	0.0201362		HSAC003813	REEP2	-0.292	anova	0.0286263
HSAC012801	ERN1	0.307	anova	0.0202003		HSAC007584	MARCH7	-0.292	anova	0.029164
HSAC019924	CTSD	0.307	anova	0.0201557		HSAC012411	FAM75A2	-0.292	anova	0.028761
HSAC001787	SEC11A	0.306	anova	0.0202696		HSAC014437	TRIM65	-0.292	anova	0.02874
HSAC001833	ZNF275	0.306	anova	0.0202782		HSAC001593	OMA1	-0.291	anova	0.0293052
HSAC002208	ZHX1	0.306	anova	0.020613		HSAC004689	RAB17	-0.291	anova	0.0297638
HSAC005767	DPY19L4	0.306	anova	0.020201		HSAC006158	GALT	-0.291	anova	0.0293033
HSAC008629	KPNA5	0.306	anova	0.0202301		HSAC009423	KRTCAP2	-0.291	anova	0.0297282
HSAC010988	CTNNBIP1	0.306	anova	0.0202462		HSAC010932	CEBPB	-0.291	anova	0.0297666
HSAC011548	ASF1A	0.306	anova	0.0202311		HSAC016812	RASSF6	-0.291	anova	0.0291952
HSAC019043	NGRN	0.306	anova	0.020567		HSAC016987	PSMD5	-0.291	anova	0.0292434
HSAC021183	M6PR	0.306	anova	0.0202048		HSAC017568	C19orf6	-0.291	anova	0.0294056
HSAC000343	TNFSF8	0.305	anova	0.0209874		HSAC003503	RNASEH2A	-0.29	anova	0.0306987
HSAC000744	LLGL2	0.305	anova	0.0209603		HSAC003758	TMCO3	-0.29	anova	0.0301758
HSAC000820	PSMG2	0.305	anova	0.0209461		HSAC020442	SLU7	-0.29	anova	0.0301331
HSAC002164	PTRH2	0.305	anova	0.0209549		HSAC000303	TAF1	-0.289	anova	0.0311463
HSAC002320	ART4	0.305	anova	0.0207479		HSAC002569	PSPC1	-0.289	anova	0.0311386
HSAC005354	FURIN	0.305	anova	0.0209915		HSAC003103	ZNF496	-0.289	anova	0.031098
HSAC006087	NAGA	0.305	anova	0.0209032		HSAC004346	ATF1	-0.289	anova	0.0310082
HSAC007006	GADD45GIP1	0.305	anova	0.0209118		HSAC012321	ABL2	-0.289	anova	0.0310427
HSAC011572	OTUB1	0.304	anova	0.0212567		HSAC014300	CALU	-0.289	anova	0.0310973
HSAC011781	OSBPL5	0.304	anova	0.0213129		HSAC017599	HMGN5	-0.289	anova	0.0312432
HSAC000727	EGR4	0.303	anova	0.0217902		HSAC000869	LGALS8	-0.288	anova	0.03143
HSAC004651	ZCRB1	0.303	anova	0.0217592		HSAC001994	CCL13	-0.288	anova	0.031654
HSAC006736	GALNT1	0.303	anova	0.0219309		HSAC002224	TCERG1	-0.288	anova	0.0315562
HSAC009464	RUFY1	0.303	anova	0.0217752		HSAC004793	SERGEF	-0.288	anova	0.0320865
HSAC010038	MRPL34	0.303	anova	0.0216214		HSAC012658	EPT1	-0.288	anova	0.032182
HSAC010402	STMN2	0.303	anova	0.0221617		HSAC015374	AC013722,2	-0.288	anova	0.032081
HSAC000210	UBE2B	0.302	anova	0.0222078		HSAC017652	WDR37	-0.288	anova	0.0317466
HSAC003873	PDCD10	0.302	anova	0.0223493		HSAC000352	MCC	-0.287	anova	0.0324811
HSAC003925	CETN3	0.302	anova	0.0223015		HSAC002287	ZNF804B	-0.287	anova	0.0321608
HSAC006441	FBRS	0.302	anova	0.0222873		HSAC007389	TUBB3	-0.287	anova	0.0321494
HSAC008648	THNSL1	0.302	anova	0.0222766		HSAC007503	SFRS11	-0.287	anova	0.0325309
HSAC001868	C8orf40	0.301	anova	0.0230299		HSAC008168	TBC1D4	-0.287	anova	0.0322779
HSAC008644	CHMP1A	0.301	anova	0.0229652		HSAC018653	AC078855,1	-0.287	anova	0.0323276
HSAC009839	SIL1	0.301	anova	0.0231219		HSAC020941	PON2	-0.286	anova	0.0331028
HSAC011580	ZNF22	0.301	anova	0.0232526		HSAC002681	DONSON	-0.285	anova	0.0345115
HSAC015857	C6orf47	0.301	anova	0.0230224		HSAC002882	CDK5RAP3	-0.285	anova	0.0345318
HSAC000237	FCER1A	0.3	anova	0.023573		HSAC012870	POLL	-0.285	anova	0.0345631
HSAC000298	XXbac-BPG181M17,5	0.3	anova	0.0234732		HSAC017700	C8orf17	-0.285	anova	0.0346864
HSAC001231	GIPC1	0.3	anova	0.023694		HSAC000311	ALOX12	-0.284	anova	0.0351124
HSAC004563	UBLCP1	0.3	anova	0.023466		HSAC003766	DDX11	-0.284	anova	0.0349165
HSAC006104	SPARCL1	0.3	anova	0.0235133		HSAC011499	AL133167,1	-0.284	anova	0.0354366
HSAC010492	TMEM115	0.3	anova	0.0235464		HSAC014490	EIF3I	-0.284	anova	0.0354002
HSAC013573	SERINC1	0.3	anova	0.0235679		HSAC014551	ANKRD20A2	-0.284	anova	0.0353955
HSAC014501	FAM160B1	0.3	anova	0.0236628		HSAC000126	SDHA	-0.283	anova	0.0360756
HSAC017316	SKIV2L2	0.3	anova	0.0237066		HSAC001385	LUC7L2	-0.283	anova	0.036091
HSAC017623	PLTP	0.3	anova	0.0236736		HSAC003958	RP11-96C23,8	-0.283	anova	0.0363254
HSAC017704	CASS4	0.3	anova	0.0237732		HSAC004516	FLRT3	-0.283	anova	0.0362083
HSAC005321	ABI3BP	0.299	anova	0.0244996		HSAC007296	MEGF8	-0.283	anova	0.0364769
HSAC006118	ANXA11	0.299	anova	0.0244797		HSAC014723	ECH1	-0.283	anova	0.0364643
HSAC007614	PYCRL	0.299	anova	0.0245255		HSAC004836	RGP1	-0.282	anova	0.0366421
HSAC008511	TCTN3	0.299	anova	0.0244035		HSAC007253	C1QTNF5	-0.282	anova	0.037157
HSAC010290	ESF1	0.299	anova	0.0245116		HSAC007794	DLK1	-0.282	anova	0.0370462
HSAC010462	2006-09-01	0.299	anova	0.0244804		HSAC008084	ARHGEF7	-0.282	anova	0.0369957
HSAC001245	GABARAPL2	0.298	anova	0.0248129		HSAC008206	KDM1A	-0.282	anova	0.0371935
HSAC005299	HOXA2	0.298	anova	0.0247933		HSAC012945	ADAMTS13	-0.282	anova	0.0367742
HSAC009097	CCDC30	0.298	anova	0.0247265		HSAC015894	PPP1R9A	-0.282	anova	0.0372126
HSAC010697	CDK4	0.298	anova	0.0248808		HSAC016363	AC011477,2	-0.282	anova	0.0371211
HSAC011017	LGALS7	0.298	anova	0.024782		HSAC019125	FAM73B	-0.282	anova	0.0371539
HSAC012401	GTSF1L	0.298	anova	0.0247559		HSAC019369	HRASLS	-0.282	anova	0.036693
HSAC014135	SIRPA	0.298	anova	0.0247852		HSAC021223	RIBC1	-0.282	anova	0.0372136
HSAC018169	CCL2	0.298	anova	0.0248507		HSAC001253	BCAR3	-0.281	anova	0.0371953
HSAC020200	NXNL1	0.298	anova	0.0246212		HSAC001755	IDI2	-0.281	anova	0.0371856
HSAC001474	GABARAP	0.297	anova	0.0253787		HSAC003732	ATL2	-0.281	anova	0.0377449
HSAC002279	DTNB	0.297	anova	0.0251301		HSAC004841	SPTB	-0.281	anova	0.0377823
HSAC006241	USP14	0.297	anova	0.0252011		HSAC006120	NEDD8	-0.281	anova	0.0374613
HSAC006674	LAPTM5	0.297	anova	0.0251192		HSAC007738	SH3BP2	-0.281	anova	0.0373954
HSAC006929	FAM175B	0.297	anova	0.0253621		HSAC008140	GBA2	-0.281	anova	0.0377664
HSAC010771	C17orf66	0.297	anova	0.0252193		HSAC009645	POLR2B	-0.281	anova	0.0378489
HSAC011118	TSPAN14	0.297	anova	0.0253695		HSAC010557	CLCC1	-0.281	anova	0.0371797
HSAC012816	C17orf59	0.297	anova	0.0252679		HSAC013740	OXA1L	-0.281	anova	0.0378143
HSAC014426	ZFP30	0.297	anova	0.0251556		HSAC016923	DLG1	-0.281	anova	0.0372661
HSAC015225	ADAM12	0.297	anova	0.0252516		HSAC017246	PLXNB1	-0.281	anova	0.0372445
HSAC015491	MAPRE1	0.297	anova	0.0252318		HSAC001307	AC093323,3	-0.28	anova	0.038124
HSAC017780	TMEM111	0.297	anova	0.0251554		HSAC001985	CLASP1	-0.28	anova	0.0379533
HSAC019147	IL18BP	0.297	anova	0.0252136		HSAC004119	OSGIN1	-0.28	anova	0.0377936
HSAC019981	SUV420H1	0.297	anova	0.025318		HSAC006090	ACP1	-0.28	anova	0.0381638
HSAC021129	TMED10	0.297	anova	0.0251949		HSAC011726	SLC25A1	-0.28	anova	0.0381602
HSAC004144	AC023024,2	0.296	anova	0.0262197		HSAC017028	TLN1	-0.28	anova	0.0380132
HSAC005836	MT3	0.296	anova	0.0261256		HSAC019916	GGT7	-0.28	anova	0.0378469
HSAC013972	SETD1B	0.296	anova	0.0256008		HSAC004616	ZNF623	-0.279	anova	0.0392908
HSAC014033	AP3B1	0.296	anova	0.0255746		HSAC006849	UNC119	-0.279	anova	0.0393572
HSAC016490	PACS1	0.296	anova	0.0260074		HSAC007628	SLC38A4	-0.279	anova	0.0389349
HSAC001104	CNOT6	0.295	anova	0.026929		HSAC011829	RP11-560A15,4	-0.279	anova	0.0394161
HSAC004761	FUT2	0.295	anova	0.0265284		HSAC012389	DMGDH	-0.279	anova	0.03882
HSAC006557	TIE1	0.295	anova	0.0265024		HSAC001390	RBAK	-0.278	anova	0.04024
HSAC008653	KCNH6	0.295	anova	0.0263707		HSAC002215	ARFGAP3	-0.278	anova	0.0397086
HSAC015346	C12orf59	0.295	anova	0.0269198		HSAC010043	KPNA6	-0.278	anova	0.0403742
HSAC006044	PIAS1	0.294	anova	0.0273283		HSAC011560	ICAM4	-0.278	anova	0.0400523
HSAC009583	ZNF436	0.294	anova	0.0272957		HSAC013303	DBT	-0.278	anova	0.0401094
HSAC000674	NFKBIL1	0.293	anova	0.0281605		HSAC015747	POLQ	-0.278	anova	0.0400938
HSAC000719	PCTK3	0.293	anova	0.0283038		HSAC019996	BDH2	-0.278	anova	0.0397921
HSAC003441	TMX1	0.293	anova	0.0280761		HSAC000839	NBEA	-0.277	anova	0.0406689
HSAC006645	CD83	0.293	anova	0.0281148		HSAC001009	TH1L	-0.277	anova	0.0405575
HSAC011610	RPS27L	0.293	anova	0.0282649		HSAC001798	SEMA4B	-0.277	anova	0.0408024
HSAC016545	C14orf153	0.293	anova	0.0283081		HSAC002390	CUL1	-0.277	anova	0.0406401
HSAC016587	VTA1	0.293	anova	0.0280761		HSAC002776	CCDC17	-0.277	anova	0.0409212
HSAC019776	DISP2	0.293	anova	0.0281378		HSAC009567	AL359075,1	-0.277	anova	0.040671
HSAC002092	MID2	0.292	anova	0.0285914		HSAC010179	MUSTN1	-0.277	anova	0.040588
HSAC003782	IFIT5	0.292	anova	0.0291015		HSAC015721	KCNH4	-0.277	anova	0.0406065
HSAC003897	GPR34	0.292	anova	0.0288122		HSAC017115	AL138690,1	-0.277	anova	0.0406478
HSAC006726	MMD	0.292	anova	0.0291346		HSAC000418	CDC16	-0.276	anova	0.0412389
HSAC007644	CTNND1	0.292	anova	0.0290125		HSAC003198	PTPN11	-0.276	anova	0.0412325
HSAC010670	C10orf35	0.292	anova	0.0286832		HSAC003962	TXK	-0.276	anova	0.0417696
HSAC019962	HELLS	0.292	anova	0.0291398		HSAC005785	TBC1D14	-0.276	anova	0.0415965
HSAC003884	GLRX	0.291	anova	0.0292314		HSAC013619	PRKX	-0.276	anova	0.0411063
HSAC005627	ZKSCAN3	0.291	anova	0.029181		HSAC016996	C7orf28A	-0.276	anova	0.0418187
HSAC009916	ANXA5	0.291	anova	0.0296194		HSAC017320	PCYOX1	-0.276	anova	0.0412223
HSAC010730	CACNA1A	0.291	anova	0.02928		HSAC001961	WDR77	-0.275	anova	0.0427342
HSAC017205	CD52	0.291	anova	0.0293141		HSAC007305	KIAA0406	-0.275	anova	0.0421011
HSAC000656	FMO4	0.29	anova	0.0304749		HSAC016921	AC073264,5	-0.275	anova	0.0428947
HSAC004601	CREBL1	0.29	anova	0.0303288		HSAC017309	GTF2I	-0.275	anova	0.0426116
HSAC006842	NUBP1	0.29	anova	0.0301418		HSAC020104	CRABP1	-0.275	anova	0.0422396
HSAC010302	AC137834,1	0.29	anova	0.0299642		HSAC020444	NCRNA00182	-0.275	anova	0.042606
HSAC015683	C19orf43	0.29	anova	0.0299131		HSAC003160	MYO6	-0.274	anova	0.0438063
HSAC017304	CD59	0.29	anova	0.0305295		HSAC004034	DDX60L	-0.274	anova	0.0439072
HSAC019354	AL592284,2	0.29	anova	0.0302482		HSAC009462	AC013400,2	-0.274	anova	0.0431537
HSAC002206	MARCH1	0.289	anova	0.0311095		HSAC016701	CNTLN	-0.274	anova	0.0430338
HSAC005118	TNFSF13	0.289	anova	0.0310381		HSAC018365	RP11-436K8,1	-0.274	anova	0.0430461
HSAC005818	SLC10A3	0.289	anova	0.0309094		HSAC019140	EHD2	-0.274	anova	0.0439103
HSAC007495	FXYD1	0.289	anova	0.0310178		HSAC020283	RP3-452M16,1	-0.274	anova	0.043569
HSAC008654	ZNF10	0.289	anova	0.0310599		HSAC000009	PTPN7	-0.273	anova	0.0445571
HSAC013318	NECAB2	0.289	anova	0.0310034		HSAC002598	BRWD2	-0.273	anova	0.044406
HSAC013771	PPP3CB	0.289	anova	0.0309277		HSAC003135	ZDHHC6	-0.273	anova	0.0446724
HSAC001073	FBXL5	0.288	anova	0.0321174		HSAC006585	BLMH	-0.273	anova	0.0448353
HSAC003871	ADORA3	0.288	anova	0.0318419		HSAC014935	CD2BP2	-0.273	anova	0.0438974
HSAC006033	MAP2K4	0.288	anova	0.0316281		HSAC000410	GDF5	-0.272	anova	0.044877
HSAC020881	AP000787,1	0.288	anova	0.0321441		HSAC001492	PHB2	-0.272	anova	0.0452814
HSAC001879	TNFRSF12A	0.287	anova	0.0323908		HSAC001550	SV2A	-0.272	anova	0.0452793
HSAC006311	GPX1	0.287	anova	0.0324528		HSAC001590	EXOC3	-0.272	anova	0.0458568
HSAC006993	MAP4K2	0.287	anova	0.0321568		HSAC006877	SLC23A2	-0.272	anova	0.0458536
HSAC007103	CD74	0.287	anova	0.0323905		HSAC010897	ABHD1	-0.272	anova	0.0449515
HSAC009237	GPSM3	0.287	anova	0.0321325		HSAC012378	GTSE1	-0.272	anova	0.0452045
HSAC014604	FRS3	0.287	anova	0.0328668		HSAC017081	ZNF514	-0.272	anova	0.0448838
HSAC015426	QPCTL	0.287	anova	0.032471		HSAC018798	FHAD1	-0.272	anova	0.0457788
HSAC017552	TMED9	0.287	anova	0.0321847		HSAC020936	PSMD6	-0.272	anova	0.0458137
HSAC009511	NLRP12	0.286	anova	0.0330799		HSAC000002	ADH1B	-0.271	anova	0.0460843
HSAC010349	AMPD1	0.286	anova	0.0339086		HSAC002124	C16orf72	-0.271	anova	0.0464577
HSAC011563	UBE2E2	0.286	anova	0.0333072		HSAC002236	ACSS3	-0.271	anova	0.0459942
HSAC014027	HAVCR2	0.286	anova	0.0331139		HSAC005064	VPS13A	-0.271	anova	0.0462048
HSAC019886	TM6SF1	0.286	anova	0.0333538		HSAC005675	C16orf67	-0.271	anova	0.0466542
HSAC000086	DDX6	0.285	anova	0.0341521		HSAC006018	PPP5C	-0.271	anova	0.0460034
HSAC009396	CCDC92	0.285	anova	0.0344824		HSAC009426	MLL3	-0.271	anova	0.0465665
HSAC013684	C12orf60	0.285	anova	0.034683		HSAC013337	RP11-337C18,5	-0.271	anova	0.0464905
HSAC015143	GFRA3	0.285	anova	0.0341749		HSAC018978	S100A7A	-0.271	anova	0.0462443
HSAC020469	C22orf30	0.285	anova	0.0344971		HSAC020155	RTEL1	-0.271	anova	0.0466172
HSAC001956	PARK7	0.284	anova	0.0357119		HSAC000382	GP1BA	-0.27	anova	0.0472536
HSAC005280	CDK14	0.284	anova	0.0350744		HSAC001760	SYDE1	-0.27	anova	0.0468596
HSAC007126	CLNS1A	0.284	anova	0.0357031		HSAC003039	ARMC7	-0.27	anova	0.0468359
HSAC011783	SIVA1	0.284	anova	0.0352114		HSAC005726	FAM36A	-0.27	anova	0.0473674
HSAC014013	NRIP1	0.284	anova	0.0354542		HSAC008906	VN1R1	-0.27	anova	0.0468145
HSAC015543	RP11-792D21,2	0.284	anova	0.0349201		HSAC013117	KRT82	-0.27	anova	0.0468178
HSAC016564	DYNC1LI1	0.284	anova	0.0351256		HSAC016777	U2AF1	-0.27	anova	0.0468174
HSAC000214	HOXB7	0.283	anova	0.0360957		HSAC016794	KLF15	-0.27	anova	0.0470426
HSAC000263	BRPF1	0.283	anova	0.0359459		HSAC017681	CENPJ	-0.27	anova	0.0473751
HSAC000416	COMP	0.283	anova	0.0361209		HSAC019123	FAM86A	-0.27	anova	0.0471004
HSAC001398	LEMD3	0.283	anova	0.0362139		HSAC019458	TMEM217	-0.27	anova	0.047228
HSAC002492	TSEN34	0.283	anova	0.0359157		HSAC019788	PSKH2	-0.27	anova	0.0469078
HSAC005489	C9orf9	0.283	anova	0.0363012		HSAC000721	CNTN2	-0.269	anova	0.048189
HSAC006966	CD47	0.283	anova	0.0359114		HSAC006291	SLC38A3	-0.269	anova	0.0478955
HSAC010267	LYPLAL1	0.283	anova	0.036322		HSAC000430	COL7A1	-0.268	anova	0.0492642
HSAC017315	ATG7	0.283	anova	0.0362213		HSAC006380	CDK10	-0.268	anova	0.049221
HSAC002459	ZFP106	0.282	anova	0.0369937		HSAC009303	SIAE	-0.268	anova	0.0492209
HSAC004577	MSC	0.282	anova	0.0372414		HSAC011674	IL17B	-0.268	anova	0.0487326
HSAC005735	DOK2	0.282	anova	0.0372356		HSAC013690	C5orf55	-0.268	anova	0.04915
HSAC006089	SLC1A3	0.282	anova	0.0366582		HSAC016911	FAF1	-0.268	anova	0.049495
HSAC010314	PTGFR	0.282	anova	0.0371528		HSAC019150	RP11-261C10,3	-0.268	anova	0.0492312
HSAC011405	CLEC11A	0.282	anova	0.0371587		HSAC019714	CDRT4	-0.268	anova	0.0492238
HSAC015770	GNPTG	0.282	anova	0.0370258
HSAC015778	CRNN	0.282	anova	0.0370504
HSAC000184	PFKFB1	0.281	anova	0.0374333
HSAC002144	RNF111	0.281	anova	0.0371852
HSAC002989	FBXW11	0.281	anova	0.0378213
HSAC008560	BRSK1	0.281	anova	0.0378492
HSAC010371	TAF10	0.281	anova	0.0372414
HSAC012271	ZNHIT2	0.281	anova	0.0378854
HSAC012530	ASB6	0.281	anova	0.0372392
HSAC016339	CYSLTR2	0.281	anova	0.0377939
HSAC000783	PKIG	0.28	anova	0.0377269
HSAC002077	SRPRB	0.28	anova	0.0377839
HSAC005631	NT5C	0.28	anova	0.038324
HSAC007086	EFR3A	0.28	anova	0.0378557
HSAC007951	RP11-480I12,7	0.28	anova	0.0383493
HSAC012604	CLEC5A	0.28	anova	0.0381368
HSAC012855	TSPAN9	0.28	anova	0.0380387
HSAC015694	OBFC2B	0.28	anova	0.0377177
HSAC016404	NUBP2	0.28	anova	0.0379983
HSAC017752	CHCHD5	0.28	anova	0.0382289
HSAC020027	SLITRK1	0.28	anova	0.0381079
HSAC020944	FBXW2	0.28	anova	0.0381206
HSAC000456	IQGAP1	0.279	anova	0.0392961
HSAC000705	EPHB3	0.279	anova	0.0394246
HSAC001816	CD300A	0.279	anova	0.0387398
HSAC006093	AC092037,1	0.279	anova	0.0392876
HSAC007830	MAFB	0.279	anova	0.0393875
HSAC010632	RRM2B	0.279	anova	0.0384089
HSAC000241	HLA-DPA1	0.278	anova	0.0400501
HSAC018121	FZD8	0.278	anova	0.0403891
HSAC020806	UXS1	0.278	anova	0.039883
HSAC000211	ATP4B	0.277	anova	0.0406385
HSAC000261	ENDOU	0.277	anova	0.0406521
HSAC000279	SFTPC	0.277	anova	0.0405971
HSAC001707	BCORL1	0.277	anova	0.0406024
HSAC002572	WDFY2	0.277	anova	0.0407158
HSAC003417	SNORD113	0.277	anova	0.040642
HSAC003641	KIAA0319	0.277	anova	0.040565
HSAC004459	RCN3	0.277	anova	0.0406037
HSAC004513	C21orf7	0.277	anova	0.0405628
HSAC004737	QTRTD1	0.277	anova	0.0406758
HSAC006566	TCEA1	0.277	anova	0.0405673
HSAC007619	ASNA1	0.277	anova	0.0405972
HSAC012940	UQCRB	0.277	anova	0.0405916
HSAC013583	PPRC1	0.277	anova	0.0406401
HSAC014239	LY86	0.277	anova	0.0406358
HSAC017591	MAS1L	0.277	anova	0.0406338
HSAC020433	IMMP1L	0.277	anova	0.0406272
HSAC001806	C1QA	0.276	anova	0.0418205
HSAC005996	RHOG	0.276	anova	0.0419439
HSAC006798	KRT1	0.276	anova	0.0417656
HSAC011962	DPEP2	0.276	anova	0.0417409
HSAC014470	RSRC1	0.276	anova	0.041518
HSAC001494	LRRC20	0.275	anova	0.0428102
HSAC004839	FEM1C	0.275	anova	0.0420779
HSAC005091	CCL11	0.275	anova	0.0427846
HSAC007080	SLCO2A1	0.275	anova	0.0427539
HSAC009440	NUS1	0.275	anova	0.0420976
HSAC010654	IFI27L2	0.275	anova	0.042326
HSAC012314	THRB	0.275	anova	0.0422434
HSAC012664	ZNRF2	0.275	anova	0.0422287
HSAC020435	CHCHD4	0.275	anova	0.0426123
HSAC000438	GGT5	0.274	anova	0.0429751
HSAC000932	NUDT3	0.274	anova	0.042941
HSAC004683	TREM2	0.274	anova	0.0433172
HSAC004962	CCL19	0.274	anova	0.0437185
HSAC006679	EMP1	0.274	anova	0.0430674
HSAC008627	SLC35B2	0.274	anova	0.0439248
HSAC012093	DNASE2	0.274	anova	0.0430197
HSAC016937	NRBP1	0.274	anova	0.0435839
HSAC003412	NXT1	0.273	anova	0.0439105
HSAC006384	PTDSS1	0.273	anova	0.0445438
HSAC007675	FAM173A	0.273	anova	0.044519
HSAC010600	LHFP	0.273	anova	0.0446244
HSAC010640	ZNF580	0.273	anova	0.0438982
HSAC010675	RPP38	0.273	anova	0.0445342
HSAC013798	LHX4	0.273	anova	0.0441474
HSAC014104	SLC46A2	0.273	anova	0.0443369
HSAC014786	MMP25	0.273	anova	0.0443754
HSAC017596	ESRP2	0.273	anova	0.0445501
HSAC001157	MANBAL	0.272	anova	0.0456913
HSAC001364	CRLF3	0.272	anova	0.0456983
HSAC001601	PLEKHB1	0.272	anova	0.0448969
HSAC005225	LAT2	0.272	anova	0.0457765
HSAC010754	TMX3	0.272	anova	0.0458052
HSAC016603	PPP1R2	0.272	anova	0.0451924
HSAC020488	ZMAT2	0.272	anova	0.045317
HSAC002955	YTHDF2	0.271	anova	0.0466556
HSAC003538	TMEM204	0.271	anova	0.0462242
HSAC005055	HSPBP1	0.271	anova	0.0466349
HSAC007075	CTSK	0.271	anova	0.0463393
HSAC007309	KIAA0040	0.271	anova	0.0464098
HSAC007679	ZNF483	0.271	anova	0.0465954
HSAC011403	DEFB4A	0.271	anova	0.0465932
HSAC012131	NME1	0.271	anova	0.0461976
HSAC015586	SLC35A5	0.271	anova	0.0461076
HSAC017817	PCDHGA11	0.271	anova	0.0466042
HSAC000835	RTN2	0.27	anova	0.0468771
HSAC001036	MMADHC	0.27	anova	0.0468506
HSAC002903	SLAMF8	0.27	anova	0.0470026
HSAC007036	NFE2L1	0.27	anova	0.0470819
HSAC008027	NUP88	0.27	anova	0.0472139
HSAC008445	GRN	0.27	anova	0.047032
HSAC009920	TPM2	0.27	anova	0.047326
HSAC014626	TERF1	0.27	anova	0.0471441
HSAC016712	AREG	0.27	anova	0.0470903
HSAC019677	EEF1D	0.27	anova	0.0467994
HSAC000789	TMEM98	0.269	anova	0.0483507
HSAC001790	ARL2BP	0.269	anova	0.0482949
HSAC001863	MRPS12	0.269	anova	0.0477082
HSAC009922	RAB1B	0.269	anova	0.0474905
HSAC013855	MDFI	0.269	anova	0.0474714
HSAC013863	RP11-318M2,2	0.269	anova	0.0480889
HSAC014360	USP25	0.269	anova	0.0485236
HSAC015428	WBP2	0.269	anova	0.0479473
HSAC015816	TIMP3	0.269	anova	0.0479447
HSAC019508	IRF5	0.269	anova	0.047541
HSAC001265	FBXO32	0.268	anova	0.049183
HSAC001967	MS4A7	0.268	anova	0.0491369
HSAC005012	MYLPF	0.268	anova	0.0494162
HSAC006326	HLA-DRA	0.268	anova	0.0491977
HSAC007520	STON1-GTF2A1L	0.268	anova	0.0494829
HSAC009394	SAV1	0.268	anova	0.0491434
HSAC013949	BACH1	0.268	anova	0.0489389
HSAC014650	SLC7A7	0.268	anova	0.0487006
HSAC019322	ASPH	0.268	anova	0.0492093
HSAC019963	MARCH5	0.268	anova	0.0487049
HSAC002618	TBC1D23	0.267	anova	0.0499742
HSAC008089	KIAA1279	0.267	anova	0.0497102
HSAC012912	ABI3	0.267	anova	0.0496844
HSAC015357	C1orf144	0.267	anova	0.0499857
HSAC016829	GS1-164F24,1	0.267	anova	0.0497186

## Sheet: Table S4
KEGG pathway finder - R2 (p<0.0001)	p value		Canonical Pathways - IPA	p value
Oxidative_phosphorylation	0.00041		Oxidative phopshorylation	0.00017
Protein_processing_in_endoplasmic_reticulum	0.0005		Mitochondrial dysfunction	0.00055
Protein_export	0.0024		Ubiquinone synthesis	0.0031
Homologous_recombination	0.0066
Spliceosome	0.0077
DNA_replication	0.0079
RNA_degradation	0.02
PI3K_Akt_signaling_pathway	0.02
Parkinson_s_disease	0.02
Non_alcoholic_fatty_liver_disease__NAFLD_	0.03

## Sheet: Table S5
Oxidative_phosphorylation	Mitochondrial_dysfunction	Ubiquinone_synthesis	Mitochondrial_biogenesis	p value
NDUFA13 (complex I)	NDUFA13	NDUFA13		4e-07
			MRPS16	4.6e-06
			SIRT1	5.1e-06
ATP6V0E1 (complex V)				1.1e-05
			TIMM8B	5e-05
COX7A1 (complex IV)	COX7A1			5.8e-05
NDUFB1 (complex I)	NDUFB1	NDUFB1		6.2e-05
ATP5H (complex V)				6.6e-05
NDUFB8 (complex I)	NDUFB8	NDUFB8		7.3e-05
NDUFA2 (complex I)	NDUFA2	NDUFA2		8.4e-05
			MRPS28	9.4e-05
			MRPL1	0.00023
NDUFS4 (complex I)	NDUFS4	NDUFS4		0.00026
NDUFB7 (complex I)	NDUFB7	NDUFB7		0.00029
			RG9MTD1	0.00038
COX7C (complex IV)	COX7C			0.0005
		PTPRT		0.00051
			TSPO	0.00056
			MRPL11	0.00059
ATP6V1D (complex V)				0.00065
COX8A (complex IV)	COX8A			0.00068
	FURIN			0.00075
			MRPL34	0.00079
	MAP2K4			0.0015
	PARK7			0.0018
ATP4B (complex V)				0.0023
UQCRB (complex III)	UQCRB			0.0023
			PPRC1	0.0023
			IMMP1L	0.0023
			CHCHD4	0.0025
			MRPS12	0.0031
			MARCH5	0.0032
			KIAA1279	0.0033

## Sheet: Table S6
	ATP synthesis (pmoles/min/10^5 cells)
	Glycolysis		OxPhos
Colonosphere	Control	Chemo	Control	Chemo
CRC09	321	264 (↓)	67.5	72.5 (=)
L145	285	156 (↓)	65	105 (↑)
CRC29	ND	ND	142.5	520 (↑)
